# Supplementary material for: The impact of digital health interventions on the psychological outcomes of patients and families receiving paediatric palliative care: A systematic review and narrative synthesis
Source: PubMed Central journal article supplement — Palliat Med. 2021 Jun 23;35(10):2017–23. doi: 10.1177/02692163211026523 (PMC8641035; doi:10.1177/02692163211026523), 2021-06-23
Supplement: sj-pdf-1-pmj-10.1177_02692163211026523.pdf [file sj-pdf-1-pmj-10.1177_02692163211026523.pdf]

Supplementary file 1: Ovid MEDLINE Search Strategy

**FACET: Digital health Intervention**

|    |                                                                                                                                                                                                                                                                                                                                                                                                                                                                                                                                                                                 |
|----|---------------------------------------------------------------------------------------------------------------------------------------------------------------------------------------------------------------------------------------------------------------------------------------------------------------------------------------------------------------------------------------------------------------------------------------------------------------------------------------------------------------------------------------------------------------------------------|
| 1  | Telemedicine/ (25052)                                                                                                                                                                                                                                                                                                                                                                                                                                                                                                                                                           |
| 2  | Telepathology/ (857)                                                                                                                                                                                                                                                                                                                                                                                                                                                                                                                                                            |
| 3  | Telerehabilitation/ (430)                                                                                                                                                                                                                                                                                                                                                                                                                                                                                                                                                       |
| 4  | Remote Consultation/ (4927)                                                                                                                                                                                                                                                                                                                                                                                                                                                                                                                                                     |
| 5  | Videoconferencing/ (1671)                                                                                                                                                                                                                                                                                                                                                                                                                                                                                                                                                       |
| 6  | Medical Informatics/ (12091)                                                                                                                                                                                                                                                                                                                                                                                                                                                                                                                                                    |
| 7  | Telecommunications/ (4857)                                                                                                                                                                                                                                                                                                                                                                                                                                                                                                                                                      |
| 8  | Wireless Technology/ (3682)                                                                                                                                                                                                                                                                                                                                                                                                                                                                                                                                                     |
| 9  | Mobile Applications/ (6611)                                                                                                                                                                                                                                                                                                                                                                                                                                                                                                                                                     |
| 10 | Cell Phones/ (8726)                                                                                                                                                                                                                                                                                                                                                                                                                                                                                                                                                             |
| 11 | Smartphone/ (4963)                                                                                                                                                                                                                                                                                                                                                                                                                                                                                                                                                              |
| 12 | Internet/ (74110)                                                                                                                                                                                                                                                                                                                                                                                                                                                                                                                                                               |
| 13 | computer communication network/ (13614)                                                                                                                                                                                                                                                                                                                                                                                                                                                                                                                                         |
| 14 | computers, handheld/ (3677)                                                                                                                                                                                                                                                                                                                                                                                                                                                                                                                                                     |
| 15 | microcomputers/ (14295)                                                                                                                                                                                                                                                                                                                                                                                                                                                                                                                                                         |
| 16 | computers, handheld/ (3677)                                                                                                                                                                                                                                                                                                                                                                                                                                                                                                                                                     |
| 17 | Webcasts/ (959)                                                                                                                                                                                                                                                                                                                                                                                                                                                                                                                                                                 |
| 18 | (telemedicine or tele medicine or telehealth or tele health or telecare or tele care or telecommunicat* or tele communicat* or teleconferenc* or tele conferenc* or teleconsultat* or tele consultat* or telenursing or tele nursing or telemonitoring or tele monitoring or teletherap* or tele therap* or telecardiolog* or tele cardiolog* or teledermatolog* or tele dermatolog* or telediagnos* or tele diagnos* or telepatholog* or tele patholog* or telepsychiatr* or tele psychiatr* or telepsycholog* or tele psycholog* or telerehab* or tele rehab*).ab,ti. (26750) |
| 19 | ((information or communicat*) adj technolog*).ab,ti. (17429)                                                                                                                                                                                                                                                                                                                                                                                                                                                                                                                    |
| 20 | "application of technolog*".ab,ti. (523)                                                                                                                                                                                                                                                                                                                                                                                                                                                                                                                                        |
| 21 | ((mobile or telephone or remote* or virtual* or wireless) adj3 (rehabilitat* or consultat* or counselling or communicat* or team*)).ab,ti. (8005)                                                                                                                                                                                                                                                                                                                                                                                                                               |
| 22 | ((mobile or portable or wireless or wearable) adj3 (device* or technolog*)).ab,ti. (18805)                                                                                                                                                                                                                                                                                                                                                                                                                                                                                      |
| 23 | ((mobile or portable) adj3 application*).ab,ti. (4852)                                                                                                                                                                                                                                                                                                                                                                                                                                                                                                                          |
| 24 | (smartphone* or smart phone* or smart-phone* or mobilephone* or mobile phone* or mobile-phone* or cellphone* or cell* phone* or cell-phone* or personal digital assistant or palm pilot*).ab,ti. (24576)                                                                                                                                                                                                                                                                                                                                                                        |
| 25 | (webbased or web based or app or apps or ipad* or skype or internet or laptop* or web camera* or videoconferenc* or video conferenc* or touchscreen* or touch screen* or computer* or microcomputer* or pc or pcs or tablet*).ab,ti. (540917)                                                                                                                                                                                                                                                                                                                                   |
| 26 | ((medical or health or nursing) adj Informatics).ab,ti. (4524)                                                                                                                                                                                                                                                                                                                                                                                                                                                                                                                  |
| 27 | ((medical adj (computer or information) adj science*) or health care technolog* or health technolog*).ab,ti. (8221)                                                                                                                                                                                                                                                                                                                                                                                                                                                             |
| 28 | (connected car* or ehomecare or e homecare or e home care or telehomecare or tele homecare or tele home care or smarthome technolog* or smart home technolog*).ab,ti. (308)                                                                                                                                                                                                                                                                                                                                                                                                     |
| 29 | ((ehealth or e health or emedicine or e medicine or erehabilitation* or e rehabilitation* or mhealth or m health or e-health or m-health or (electronic or mobile or digital)) adj health).ab,ti. (23206)                                                                                                                                                                                                                                                                                                                                                                       |
| 30 | (online or on line or on-line).ab,ti. (150261)                                                                                                                                                                                                                                                                                                                                                                                                                                                                                                                                  |
| 31 | social network*.ab,ti. (17767)                                                                                                                                                                                                                                                                                                                                                                                                                                                                                                                                                  |
| 32 | virtual.ab,ti. (61974)                                                                                                                                                                                                                                                                                                                                                                                                                                                                                                                                                          |
| 33 | (multimedia or multi-media or multi media).ab,ti. (5448)                                                                                                                                                                                                                                                                                                                                                                                                                                                                                                                        |
| 34 | messag*.ab,ti. (63189)                                                                                                                                                                                                                                                                                                                                                                                                                                                                                                                                                          |
| 35 | 1 or 2 or 3 or 4 or 5 or 6 or 7 or 8 or 9 or 10 or 11 or 12 or 13 or 14 or 15 or 16 or 17 or 18 or 19 or 20 or 21 or 22 or 23 or 24 or 25 or 26 or 27 or 28 or 29 or 30 or 31 or 32 or 33 or 34 (934794)                                                                                                                                                                                                                                                                                                                                                                        |

**FACET: Psychosocial**

|    |                                                                                                                                                                                                                                                        |
|----|--------------------------------------------------------------------------------------------------------------------------------------------------------------------------------------------------------------------------------------------------------|
| 36 | "adjust*".ab,ti. (633753)                                                                                                                                                                                                                              |
| 37 | "affect*".ab,ti. (1903955)                                                                                                                                                                                                                             |
| 38 | "ang*".ab,ti. (918364)                                                                                                                                                                                                                                 |
| 39 | "anx*".ab,ti. (217718)                                                                                                                                                                                                                                 |
| 40 | (body adj1 image).ab,ti. (10781)                                                                                                                                                                                                                       |
| 41 | confidence.ab,ti. (516532)                                                                                                                                                                                                                             |
| 42 | "control*".ab,ti. (3933659)                                                                                                                                                                                                                            |
| 43 | coping.ab,ti. (55532)                                                                                                                                                                                                                                  |
| 44 | "depress*".ab,ti. (469107)                                                                                                                                                                                                                             |
| 45 | "distres*".ab,ti. (128444)                                                                                                                                                                                                                             |
| 46 | "emotion*".ab,ti. (202692)                                                                                                                                                                                                                             |
| 47 | (existential adj1 cris*).ab,ti. (101)                                                                                                                                                                                                                  |
| 48 | fatigue.ab,ti. (97153)                                                                                                                                                                                                                                 |
| 49 | "helples*".ab,ti. (4968)                                                                                                                                                                                                                               |
| 50 | "hopeles*".ab,ti. (5954)                                                                                                                                                                                                                               |
| 51 | HRQoL.ab,ti. (17094)                                                                                                                                                                                                                                   |
| 52 | Identity.ab,ti. (140236)                                                                                                                                                                                                                               |
| 53 | mental.ab,ti. (347595)                                                                                                                                                                                                                                 |
| 54 | mood.ab,ti. (74905)                                                                                                                                                                                                                                    |
| 55 | pain.ab,ti. (638184)                                                                                                                                                                                                                                   |
| 56 | "psycholog*".ab,ti. (267562)                                                                                                                                                                                                                           |
| 57 | "psychosexual*".ab,ti. (1927)                                                                                                                                                                                                                          |
| 58 | psychosocial.ab,ti. (96883)                                                                                                                                                                                                                            |
| 59 | QoL.ab,ti. (39772)                                                                                                                                                                                                                                     |
| 60 | (quality adj2 life).ab,ti. (292386)                                                                                                                                                                                                                    |
| 61 | quality-of-life.ab,ti. (287903)                                                                                                                                                                                                                        |
| 62 | satsisfaction.ab,ti. (0)                                                                                                                                                                                                                               |
| 63 | (self adj1 efficacy).ab,ti. (28671)                                                                                                                                                                                                                    |
| 64 | (self adj1 esteem).ab,ti. (21181)                                                                                                                                                                                                                      |
| 65 | (self adj1 image).ab,ti. (3705)                                                                                                                                                                                                                        |
| 66 | self-efficacy.ab,ti. (28642)                                                                                                                                                                                                                           |
| 67 | self-esteem.ab,ti. (21173)                                                                                                                                                                                                                             |
| 68 | self-image.ab,ti. (3496)                                                                                                                                                                                                                               |
| 69 | (sexual adj1 dysfunction).ab,ti. (10284)                                                                                                                                                                                                               |
| 70 | sexulaity.ab,ti. (2)                                                                                                                                                                                                                                   |
| 71 | "stress*".ab,ti. (858246)                                                                                                                                                                                                                              |
| 72 | (well adj1 being).ab,ti. (81019)                                                                                                                                                                                                                       |
| 73 | wellbeing.ab,ti. (17090)                                                                                                                                                                                                                               |
| 74 | well-being.ab,ti. (79416)                                                                                                                                                                                                                              |
| 75 | wellness.ab,ti. (10191)                                                                                                                                                                                                                                |
| 76 | 36 or 37 or 38 or 39 or 40 or 41 or 42 or 43 or 44 or 45 or 46 or 47 or 48 or 49 or 50 or 51 or 52 or 53 or 54 or 55 or 56 or 57 or 58 or 59 or 60 or 61 or 62 or 63 or 64 or 65 or 66 or 67 or 68 or 69 or 70 or 71 or 72 or 73 or 74 or 75 (8694889) |

**FACET: Palliative Care**

|    |                                              |
|----|----------------------------------------------|
| 77 | (advance adj1 care adj1 plan*).ab,ti. (3095) |
| 78 | (after adj1 death adj1 car*).ab,ti. (642)    |
| 79 | "bereave*".ab,ti. (8084)                     |
| 80 | dying.ab,ti. (35215)                         |
| 81 | (emergency adj1 care adj1 plan*).ab,ti. (33) |
| 82 | (end adj2 life).ab,ti. (23625)               |
| 83 | end-of-life.ab,ti. (23335)                   |

|    |                                                                                                                                     |
|----|-------------------------------------------------------------------------------------------------------------------------------------|
| 84 | (end adj1 stage).ab,ti. (69719)                                                                                                     |
| 85 | EoL.ab,ti. (1974)                                                                                                                   |
| 86 | (Final adj1 stage).ab,ti. (3946)                                                                                                    |
| 87 | grief.ab,ti. (7018)                                                                                                                 |
| 88 | grieving.ab,ti. (1564)                                                                                                              |
| 89 | hospice.ab,ti. (11951)                                                                                                              |
| 90 | (last adj1 days).ab,ti. (1035)                                                                                                      |
| 91 | (last adj1 offices).ab,ti. (30)                                                                                                     |
| 92 | (life adj1 limiting).ab,ti. (2189)                                                                                                  |
| 93 | (life adj1 threatening).ab,ti. (89672)                                                                                              |
| 94 | (limited adj1 survival).ab,ti. (670)                                                                                                |
| 95 | "palliat*".ab,ti. (76974)                                                                                                           |
| 96 | (symptom adj1 control).ab,ti. (4831)                                                                                                |
| 97 | terminal.ab,ti. (410544)                                                                                                            |
| 98 | 77 or 78 or 79 or 80 or 81 or 82 or 83 or 84 or 85 or 86 or 87 or 88 or 89 or 90 or 91 or 92 or 93 or 94 or 95 or 96 or 97 (707773) |

**FACET: Paediatric**

|     |                                                                                                                                                          |
|-----|----------------------------------------------------------------------------------------------------------------------------------------------------------|
| 99  | (pediatric or paediatric).ab,ti. (325612)                                                                                                                |
| 100 | (child\$ or newborn\$ or adolescen\$ or infan\$ or neonat\$).ab,ti. (2109351)                                                                            |
| 101 | preschool*.ab,ti. (29203)                                                                                                                                |
| 102 | teen\$.ab,ti. (30917)                                                                                                                                    |
| 103 | "pre-school*".ab,ti. (5058)                                                                                                                              |
| 104 | kindergarten\$.ab,ti. (6711)                                                                                                                             |
| 105 | (elementary adj (school\$ or student\$)).ab,ti. (10440)                                                                                                  |
| 106 | (primary adj (school\$ or student\$)).ab,ti. (12975)                                                                                                     |
| 107 | (secondary adj (school\$ or student\$)).ab,ti. (11231)                                                                                                   |
| 108 | nursery school\$.ab,ti. (1099)                                                                                                                           |
| 109 | grade school\$.ab,ti. (822)                                                                                                                              |
| 110 | public school\$.ab,ti. (6190)                                                                                                                            |
| 111 | (highschool\$ or high school\$).ab,ti. (33257)                                                                                                           |
| 112 | youth\$.ab,ti. (76892)                                                                                                                                   |
| 113 | (baby\$ or babies\$).ab,ti. (73808)                                                                                                                      |
| 114 | (schoolchild\$ or school child\$).ab,ti. (36446)                                                                                                         |
| 115 | (young* adj people).ab,ti. (30810)                                                                                                                       |
| 116 | (young* adj person).ab,ti. (1178)                                                                                                                        |
| 117 | newborn.ab,ti. (125713)                                                                                                                                  |
| 118 | "adolescen*".ab,ti. (285682)                                                                                                                             |
| 119 | (young* adj adult*).ab,ti. (105383)                                                                                                                      |
| 120 | 99 or 100 or 101 or 102 or 103 or 104 or 105 or 106 or 107 or 108 or 109 or 110 or 111 or 112 or 113 or 114 or 115 or 116 or 117 or 118 or 119 (2410186) |
